# Supplementary material
Source: Springer Nature journal article supplement (https://www.springermedizin.de/resource/supplementary/12958_2011_855_MOESM6_ESM.pdf/9569028)
Supplement: MOESM6 [file 9569028]

**(A) Control**

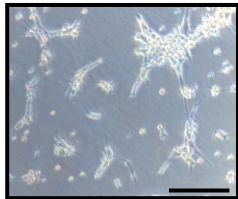

**(B) IL-8 10 ng/ml**

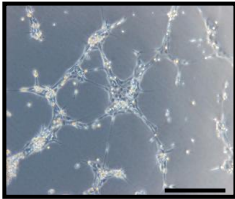

**(C) IL-8 100 ng/ml**

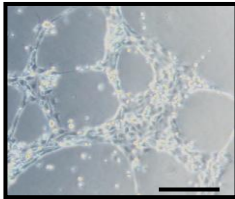

**(D) FGF2 10 ng/ml**

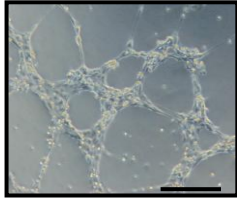

**(E) Control**

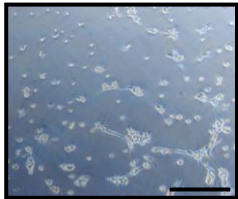

**(F) Supernatant of  
normal PMNs**

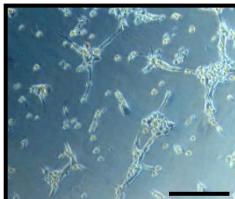

**(G) Supernatant of PMNs  
by 10 nM of fMLP**

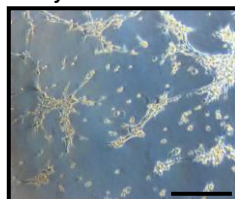

**(H) Supernatant of PMNs  
by 100 nM of fMLP**

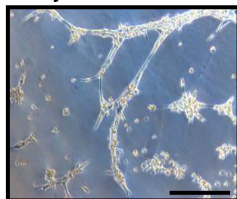

200  $\mu$ m
